# Supplementary material
Source: Springer Nature journal article supplement (https://www.springermedizin.de/resource/supplementary/12943_2010_684_MOESM1_ESM.pdf/9554574)

**a**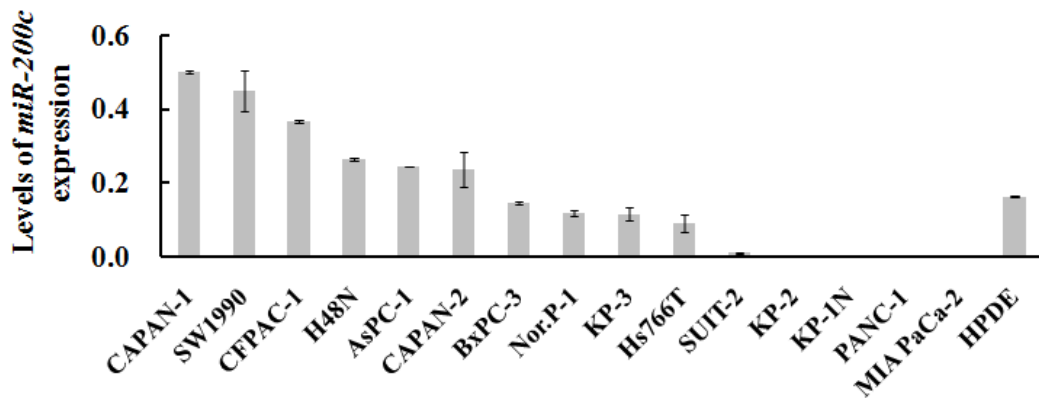**b**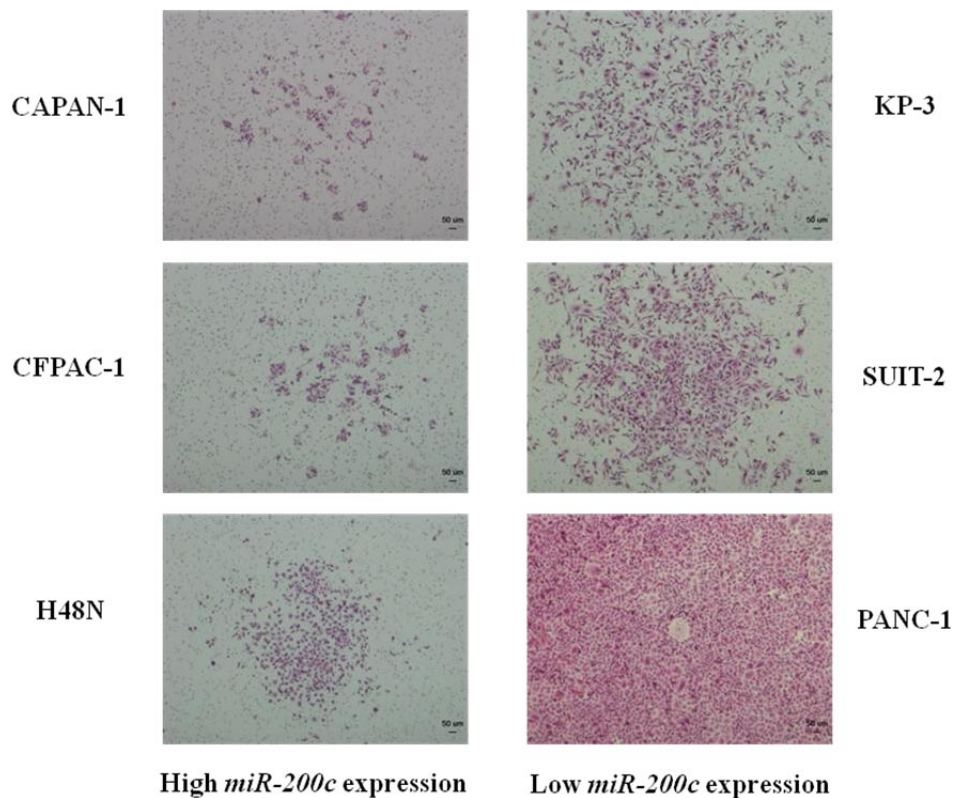

Supplement: MOESM1 [file 9554574]
